# Supplementary material
Source: PubMed Central journal article supplement (PMC7444659)
Supplement: NIHMS1615352-supplement-Biochem_SI.pdf [file NIHMS1615352-supplement-Biochem_SI.pdf]

## **SUPPORTING INFORMATION**

### **Remarkable Enhancement of Nucleotide Excision Repair of a Bulky Guanine Lesion in a Covalently Closed Circular DNA Plasmid Relative to the Same, but Linearized Plasmid**

**Marina Kolbanovskiy, Abraham Aharonoff, Ana Helena Sales, Nicholas E. Geacintov, and Vladimir Shafirovich.\***

Chemistry Department, New York University, 31 Washington Place, New York, NY 10003-5180, USA

\*E-mail: vs5@nyu.edu

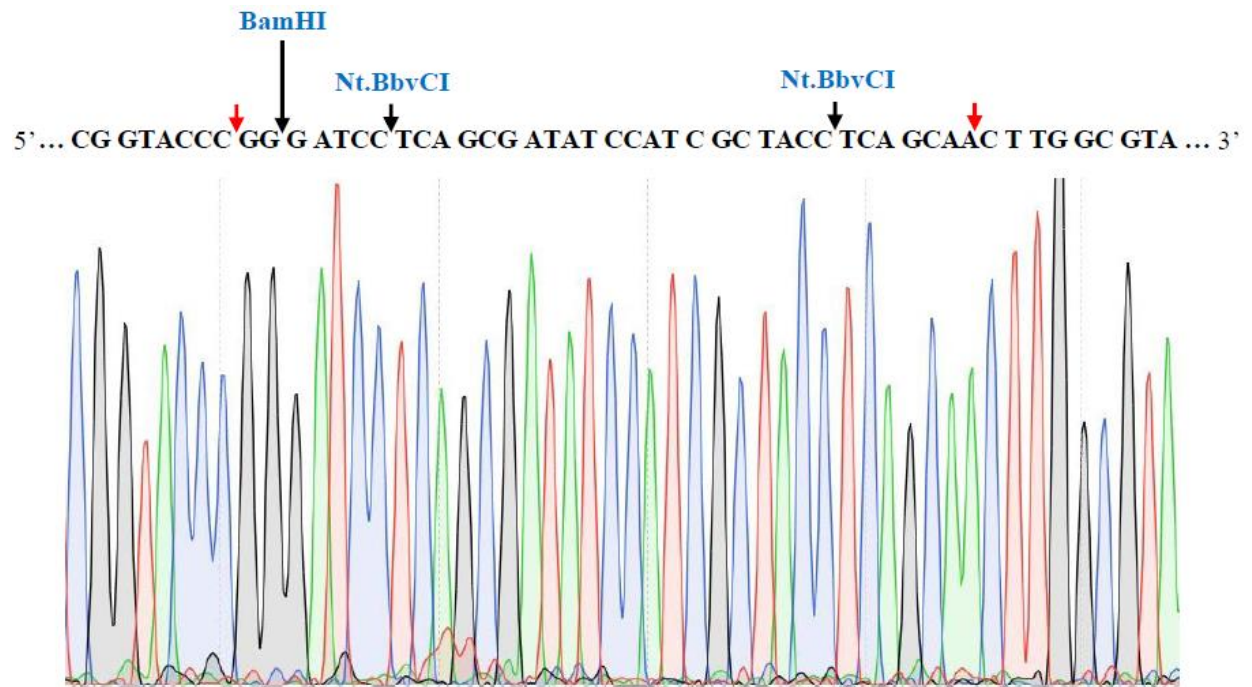

**Figure S1.** Sanger sequencing of pUC19NN plasmid with inserted recognition sequences for Nt. BbvCI nicking endonuclease (pUC19NN). Red arrows denote deletion sites of guanine.
